# Supplementary material for: Synergetic interfacial passivation, band alignment, and long-term stability with halide-optimized CsPbBrxI3−x nanocrystals for high-efficiency MAPbI3 solar cells
Source: Royal Society of Chemistry journal article supplement (doi:10.1039/d2tc00087c), 2022-01-01
Supplement: d2tc00087c1.pdf [file d2tc00087c1.pdf]

## Supporting Information for

**Synergetic Interfacial Passivation, Band Alignment, and**

**Long-Term Stability with Halide Optimized CsPbBr<sub>x</sub>I<sub>3-x</sub>**

**Nanocrystals for High Efficiency MAPbI<sub>3</sub> Solar Cells**

Meng Wang<sup>1</sup>, Long Gao<sup>1</sup>, Peixin Yu<sup>1</sup>, Qian Wang<sup>1</sup>, Chenxi Yu<sup>1</sup>, Xiaoyu

Zhang<sup>1</sup>, Yinghui Wang<sup>2</sup>, Weitao Zheng<sup>1</sup>, Jiaqi Zhang<sup>1\*</sup>

<sup>1</sup> *College of Materials Science and Engineering, Key Laboratory of Automobile Materials, Ministry of Education, Jilin University, Changchun, 130012, China*

<sup>2</sup> *Femtosecond Laser laboratory, Key Laboratory of Physics and Technology for Advanced Batteries, Ministry of Education, College of Physics, Jilin University, Changchun 130012, China.*

Corresponding author's email addresses: zhangjiaqi@jlu.edu.cn

## Experimental section

### Materials and Reagents:

N, N-dimethylformamide (DMF), chlorobenzene, dimethyl sulfoxide (DMSO), lead bromide ( $\text{PbBr}_2$ , 99.99%), caesium carbonate ( $\text{CsCO}_3$ , 99.9%) and oleic acid (OA, 90%) were purchased from Sigma-Aldrich.  $\text{PbI}_2$ , MAI, bis(trifluoromethane) sulfonimide lithium salt (Li-TFSI), 4-tertbutylpyridine (TBP) and Spiro-OMeTAD were purchased from Xian Polymer Light Technology Corp. Oleylamine (OLA, 70%), 1-octadecene (ODE, 90%) and methyl acetate were purchased from Alfa.

### Device Fabrication:

**Preparation of  $\text{SnO}_2$  colloidal solution:**  $\text{SnCl}_2 \cdot 2\text{H}_2\text{O}$  and  $\text{CH}_4\text{N}_2\text{S}$  with the mass ratio of 3:1 were dissolved in 50 mL deionized water in the iodine flask with continuously magnetic stirring, exposing to air at 25 °C. After 24 hours, the yellow and clear colloidal  $\text{SnO}_2$  solution was obtained.<sup>1</sup>

**Preparation of  $\text{SnO}_2$  layer:** The ITO glasses with the size of 1.5\*2cm were sequentially cleaned by deionized water, ethanol, acetone and isopropanol by ultrasonic process for 20 min, and then dried by nitrogen. Before being used, the clean glasses were treated with the UV-Ozone cleaner for 15 min. The obtained  $\text{SnO}_2$  solution was filtered with 0.22  $\mu\text{m}$  PTFE filter before use. 65  $\mu\text{L}$  of  $\text{SnO}_2$  solution were spin-coated on ITO substrate at 3000 rpm for 30 s, and then annealed at 180 °C for 60 min. The  $\text{SnO}_2$  layers were then treated with UV-ozone for 10 min before transferring into the glovebox for perovskite deposition.

**Preparation of perovskite layer:** The perovskite films were obtained by a one-step process. First, 553.2 mg  $\text{PbI}_2$  and 190.8 mg  $\text{CH}_3\text{NH}_3\text{I}$  were dissolved in the N, N-dimethylformamide (800  $\mu\text{L}$ ) and dimethylsulfoxide (200  $\mu\text{L}$ ) mixed solvent and stirred at 60 °C for 8 h. The perovskite precursor was filtered through a 0.22  $\mu\text{m}$  pore PTFE filter. Then 35  $\mu\text{L}$  of  $\text{PbI}_2$  solution was spun on the  $\text{SnO}_2$  / ITO substrate at 1000 rpm for 10 s and 5000 rpm for 30 s successively. During the second step, 100  $\mu\text{L}$  of chlorobenzene was poured on the center of spinning substrate 20 s prior to the end of the program. Then the films were annealed at 70 °C for 2 min and 110 °C for 10 min.

### **Preparation of perovskite NCs layer:**

Preparation of Cs-oleate: The preparation of the Cs-oleate was similar to the literature.<sup>2</sup> Then the Cs-oleate solution was stored in the refrigerator.

Synthesis of CsPbBr<sub>3</sub> NCs: 138 mg of PbBr<sub>2</sub> and 10mL ODE were loaded into a 50 mL three-necked flask. At the room temperature, nitrogen was used to clean impurities. Then the temperature of the solution was increased to 120 °C and kept for 70 min in vacuum. 1 mL of degassed OLA and OA were injected under nitrogen flowing. When the solution turned clear, the temperature of the solution was increased to 180 °C and 1 mL Cs-oleate was injected into the solution quickly. Five seconds later, the temperature of the solution was decreased to 15 °C in the ice-water bath.

Synthesis of CsPbBr<sub>1.2</sub>I<sub>1.8</sub> NCs: 55.36 mg of PbBr<sub>2</sub>, 103.8 mg of PbI<sub>2</sub> and 10mL ODE were loaded into a 50 mL three-necked flask. At the room temperature, nitrogen was used to clean impurities. Then the temperature of the solution was increased to 120 °C and kept for 70 min in a vacuum. 1 mL of degassed OLA and OA were injected under nitrogen flowing. When the solution turned clear, the temperature of the solution was increased to 170 °C and 1 mL Cs-oleate was injected into the solution quickly. Five seconds later, the temperature of the solution was decreased to 15 °C in the ice-water bath.

Synthesis of CsPbBr<sub>0.9</sub>I<sub>2.1</sub> NCs: 41.4 mg of PbBr<sub>2</sub>, 121.3 mg of PbI<sub>2</sub> and 10mL ODE were loaded into a 50 mL three-necked flask. At the room temperature, nitrogen was used to clean impurities. Then the temperature of the solution was increased to 120 °C and kept for 70 min in a vacuum. 1 mL of degassed OLA and OA were injected under nitrogen flowing. When the solution turned clear, the temperature of the solution was increased to 170 °C and 1 mL Cs-oleate was injected into the solution quickly. Five seconds later, the temperature of the solution was decreased to 15 °C in the ice-water bath.

Synthesis of CsPbI<sub>3</sub> NCs: 173.3 mg of PbI<sub>2</sub> and 10mL ODE were loaded into a 50 mL three-necked flask. At the room temperature, nitrogen was used to clean impurities. Then the temperature of the solution was increased to 120 °C and kept for 70 min in a vacuum. 1 mL of degassed OLA and OA were injected under nitrogen flowing. When

the solution turned clear, the temperature of the solution was increased to 160 °C and 1 mL Cs-oleate was injected into the solution quickly. Five seconds later, the temperature of the solution was decreased to 15 °C in the ice-water bath.

**Purification of perovskite NCs:** The reaction mixture was firstly centrifuged for 10 min at 5000 rpm. The precipitate at the bottom of the centrifuge tube was dissolved in 2 mL toluene and 3 mL ethyl acetate and then centrifuged again for 10 min at 10 000 rpm. Then the clean precipitate was dissolved in 3 mL toluene and centrifuged for 1 min at 3000 rpm. The supernatant was filtered through a 0.22 µm pore PTFE filter. The clean NCs solution was stored in a glove-box.

**NCs layer:** 30 µL of NCs solution are spin-coated onto the MAPbI<sub>3</sub> perovskite films at 4000 rpm for 30 s and then transferred to the hot plate at 50 °C for 5 min.

**Preparation of Spiro-OMeTAD layer:** 20 µL Spiro-OMeTAD solution prepared by dissolving 72.3 mg Spiro-OMeTAD, 17.5 µL Li-TFSI solution (520 mg in 1 mL acetonitrile) and 28.8 µL tert-butylpyridine in 1 mL CB was spin-coated on the NCs layer at 4000 rpm for 30s.

**Preparation of back electrode:** About 90 nm Ag was deposited by thermal evaporation. The active area of each device was 0.32 cm<sup>2</sup>.

## **Characterization**

The X-ray diffraction (XRD) spectra were conducted on a Rigaku D/max-2500 X-ray diffraction meter with Cu K $\alpha$  radiation ( $\lambda=1.5418\text{\AA}$ ). The TEM images were obtained by using FEI - Model: Tecnai G2 F30. The SEM images and EDS were obtained by using HITACHI Regulus8100 Scanning Electron Microscope. The UV-vis absorption spectra were carried out by using Shimadzu UV-3600 UV-vis spectrophotometer. The UPS measurement were obtained by thermo scientific NEXSA. The PL spectra were obtained using an FLS980 spectrometer (Edinburgh Instruments Co., Ltd.), and the excitation wavelength was 450 nm. The AFM were performed using Dimension Icon (Veeco Instruments/bruker, German) under ambient conditions. The time-resolved photoluminescence (TRPL) measurement was carried out by Fluo Time 300 (picoquant GmbH) with the 450 nm laser (LDH-P-C-405, Pico Quant GmbH). The current density-

voltage (J-V) characteristics of fabricated devices were measured using Keithley 2400 Source Meter under Air Mass 1.5 Global (AM 1.5 G) with an Oriel 300 W solar simulator intensity of 100 mW/cm<sup>2</sup>. The EQE spectra were conducted by using Crowntech QTest Station 1000 AD. TAS measurements were performed on Femtosecond Ti:Sapphire Laser System (Coherent, America). The contact angle measurement were obtained by Attension Theta Lite at ambient conditions. Electrochemical impedance spectroscopy (EIS) measurements were achieved on the CHI660E electrochemical workstation in the frequency range from 82 kHz to 1 Hz under an open circuit.

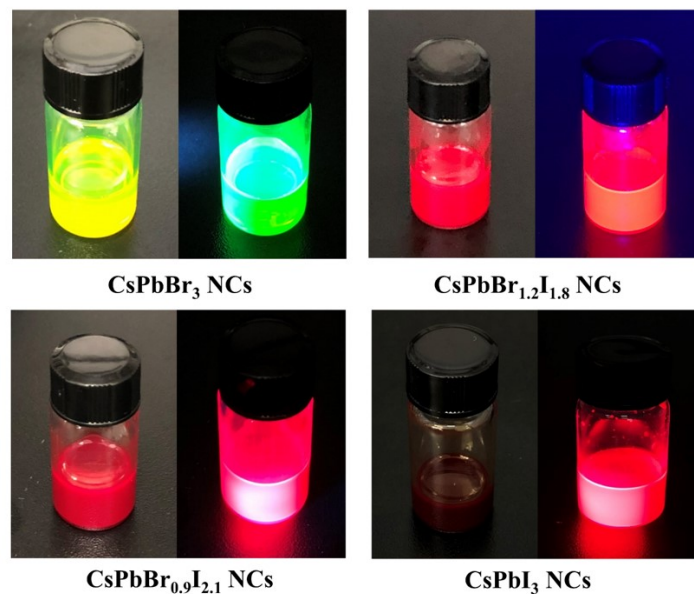

**Figure S1.** The photos of the different NCs under 365 nm UV illumination.

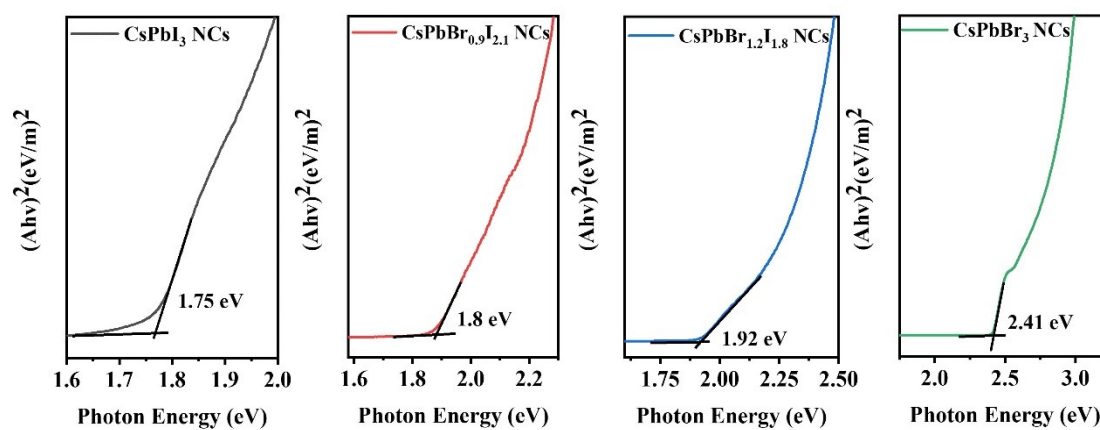

**Figure S2.** The optical band gaps of NCs derived from the Tauc plots for  $x = 0, 0.9, 1, 2$  and  $3$ , respectively.

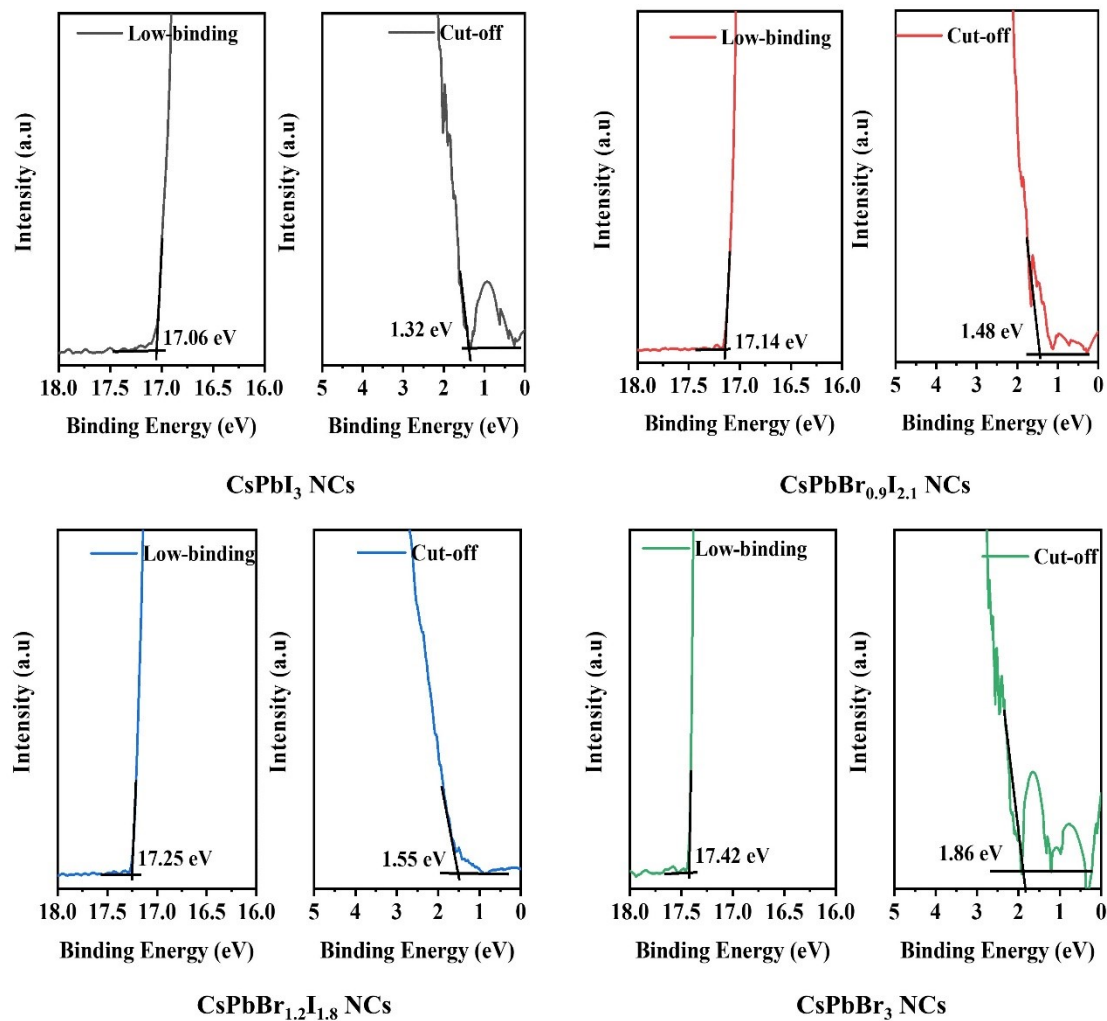

**Figure S3.** The ultraviolet photoelectron spectroscopy (UPS) of NCs for  $x = 0, 0.9, 1.2$  and  $3$ , respectively.

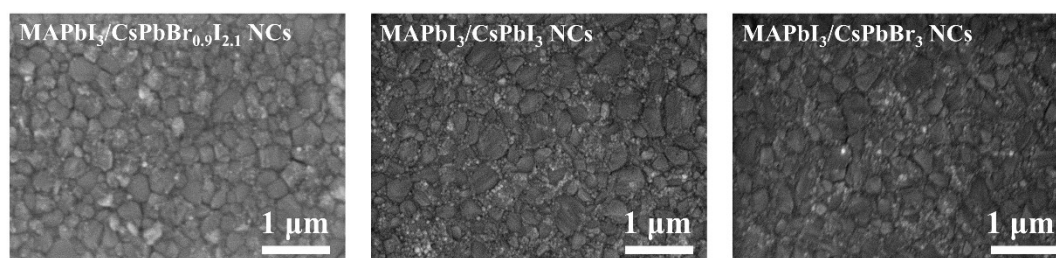

**Figure S4.** The scanning electron microscopy (SEM) images of MAPbI<sub>3</sub> films after CsPbBr<sub>0.9</sub>I<sub>2.1</sub>, CsPbBr<sub>1.2</sub>I<sub>1.8</sub> and CsPbBr<sub>3</sub> NCs treatment.

### MAPbI<sub>3</sub>/CsPbI<sub>3</sub> NCs

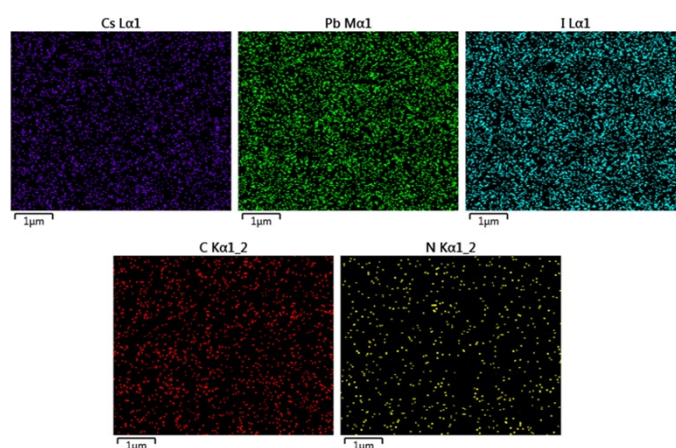

| Element                      | C     | N     | Cs   | Pb    | Br | I     |
|------------------------------|-------|-------|------|-------|----|-------|
| Ratio of the element (%)     | 49.54 | 12.48 | 0.48 | 10.03 | 0  | 27.47 |
| Quality of the element (wt%) | 9.30  | 2.73  | 1.00 | 32.48 | 0  | 54.48 |

### MAPbI<sub>3</sub>/CsPbBr<sub>0.9</sub>I<sub>2.1</sub> NCs

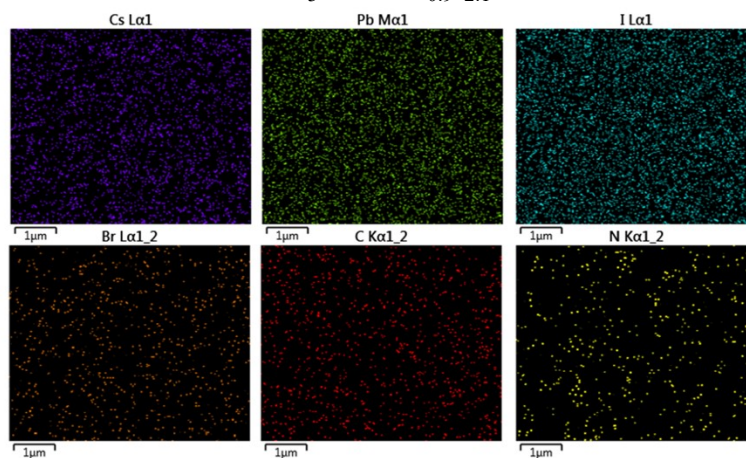

| Element                      | C     | N    | Cs   | Pb    | Br   | I     |
|------------------------------|-------|------|------|-------|------|-------|
| Ratio of the element (%)     | 43.95 | 8.83 | 0.67 | 11.79 | 1.44 | 33.33 |
| Quality of the element (wt%) | 7.01  | 1.64 | 1.18 | 32.44 | 1.53 | 56.19 |



MAPbI<sub>3</sub>/CsPbBr<sub>1.2</sub>I<sub>1.8</sub> NCs

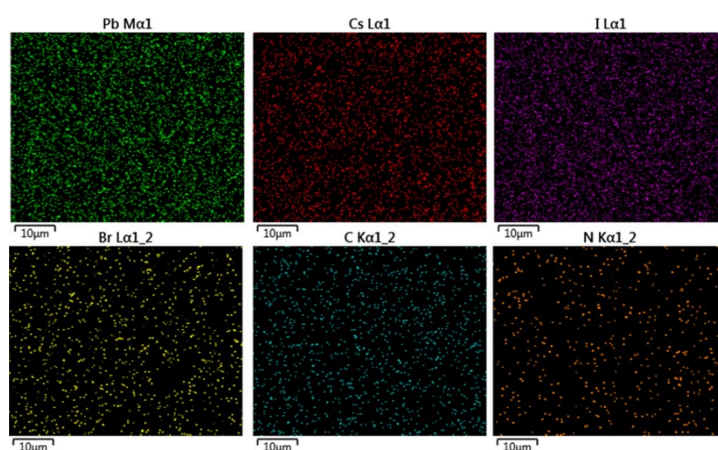

| Element                      | C     | N    | Cs   | Pb    | Br   | I     |
|------------------------------|-------|------|------|-------|------|-------|
| Ratio of the element (%)     | 51.75 | 6.05 | 0.88 | 10.25 | 3.38 | 27.7  |
| Quality of the element (wt%) | 9.23  | 1.26 | 1.74 | 31.54 | 4.01 | 52.22 |

MAPbI<sub>3</sub>/CsPbBr<sub>3</sub> NCs

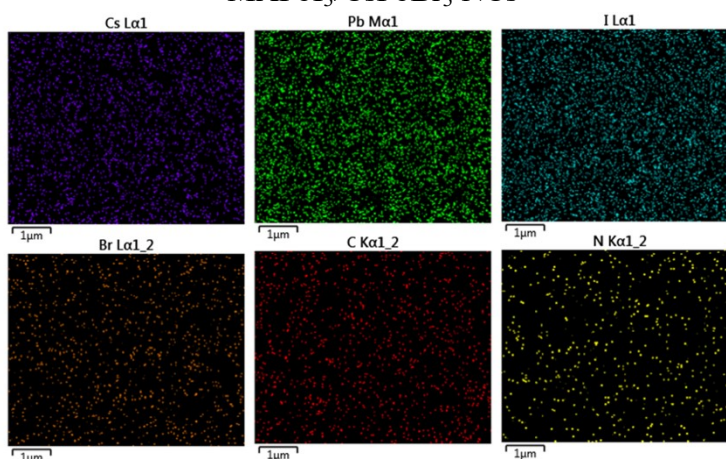

| Element                      | C     | N    | Cs   | Pb    | Br   | I     |
|------------------------------|-------|------|------|-------|------|-------|
| Ratio of the element (%)     | 49.84 | 9.88 | 0.63 | 9.85  | 1.71 | 28.10 |
| Quality of the element (wt%) | 9.12  | 2.11 | 1.27 | 31.09 | 2.08 | 54.33 |

**Figure S5.** The EDS elemental mapping images of CsPbBr<sub>x</sub>I<sub>1-x</sub> NCs modified perovskite film.

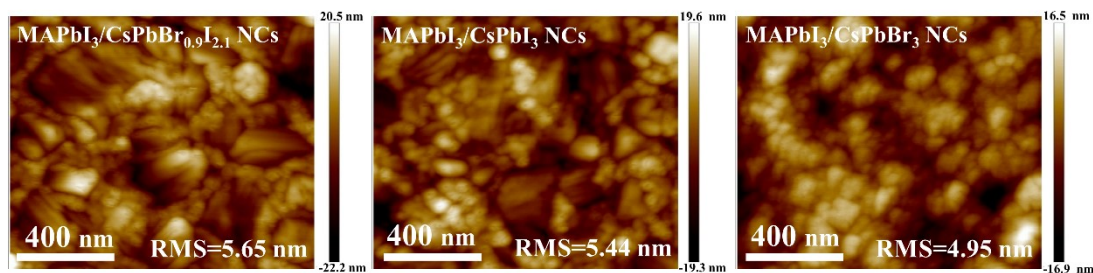

**Figure S6.** The atomic force microscopy (AFM) images of MAPbI<sub>3</sub> films after CsPbBr<sub>0.9</sub>I<sub>2.1</sub>, CsPbBr<sub>1.2</sub>I<sub>1.8</sub> and CsPbBr<sub>3</sub> NCs treatment.

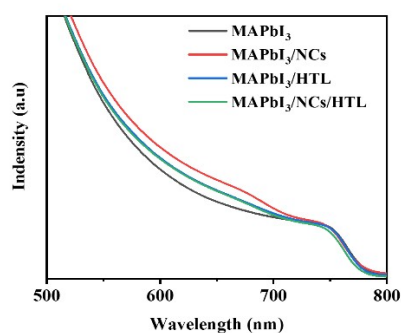

**Figure S7.** The UV-vis absorption measurement of the NCs interfacial layer on the perovskite layer with and without HTL

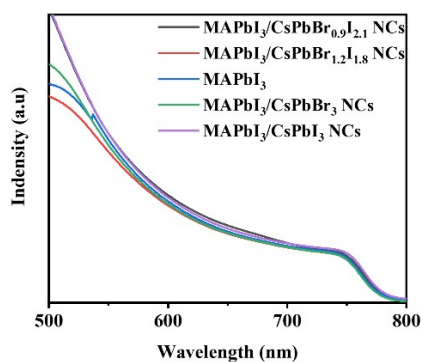

**Figure S8.** The UV-vis absorption measurement of the perovskite layers treated by different Br/I ratio of NCs

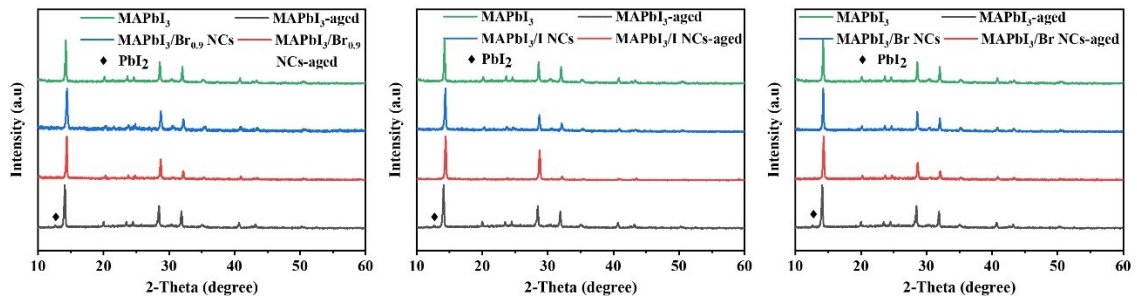

**Figure S9.** XRD patterns of the fresh and 5 days-aged MAPbI<sub>3</sub> films with and without CsPbBr<sub>0.9</sub>I<sub>2.1</sub>, CsPbBr<sub>1.2</sub>I<sub>1.8</sub> and CsPbBr<sub>3</sub> NCs treatment.

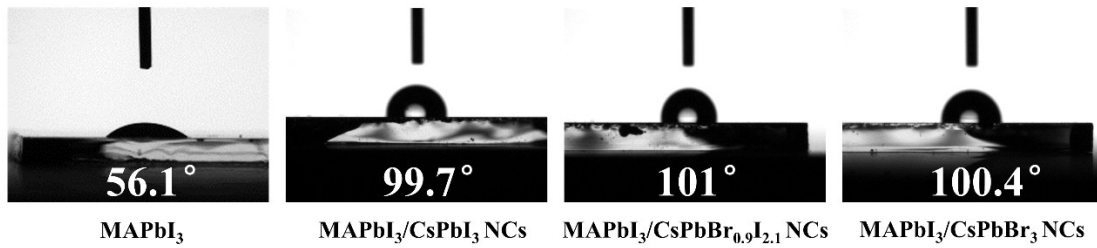

**Figure S10.** The contact angle of water for the perovskite / NCs stacks.

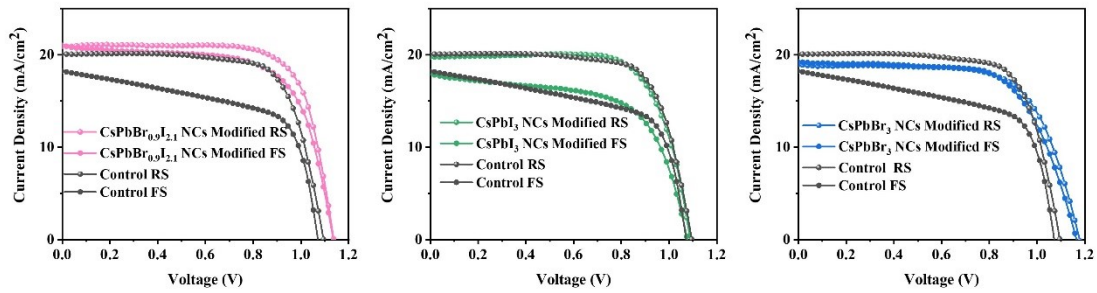

**Figure S11.** J-V curves for the NCs treatment and control devices with both forward and reverse scan directions

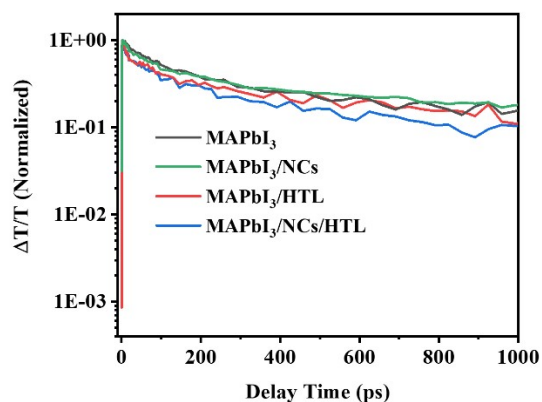

**Figure S12.** The decay dynamics of PB2 peaks of corresponding films at 730 nm.

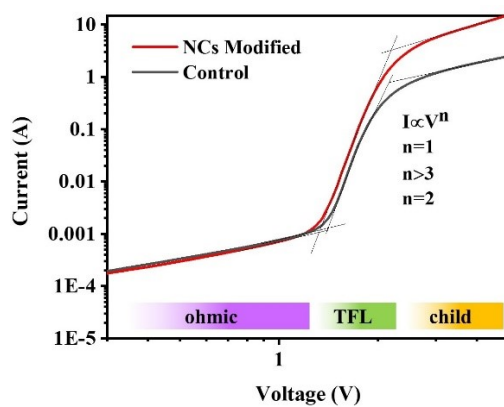

**Figure S13.** Current-Voltage (I-V) characteristics of the corresponding electron-only devices.

**Table S1.** Photovoltaic parameters of the control and CsPbBr<sub>x</sub>I<sub>1-x</sub> NCs treatment device.

| Device                                              | V <sub>oc</sub> (V) | J <sub>sc</sub> (mA cm <sup>-2</sup> ) | FF   | η (%) |
|-----------------------------------------------------|---------------------|----------------------------------------|------|-------|
| CsPbBr <sub>1.2</sub> I <sub>1.8</sub> NCs Modified | 1.13                | 22.70                                  | 0.75 | 19.16 |
| CsPbBr <sub>0.9</sub> I <sub>2.1</sub> NCs Modified | 1.14                | 20.85                                  | 0.73 | 17.52 |
| Control                                             | 1.10                | 20.12                                  | 0.70 | 16.06 |
| CsPbI <sub>3</sub> NCs Modified                     | 1.09                | 19.78                                  | 0.72 | 15.58 |
| CsPbBr <sub>3</sub> NCs Modified                    | 1.17                | 18.87                                  | 0.68 | 15.08 |

**Table S2.** The grain size statistics of CsPbBr<sub>x</sub>I<sub>1-x</sub> NCs modified perovskite film.

| Sample                  | MAPbI <sub>3</sub> | MAPbI <sub>3</sub> /CsPbBr <sub>3</sub> NCs | MAPbI <sub>3</sub> /CsPbBr <sub>1.2</sub> I <sub>1.8</sub> NCs | MAPbI <sub>3</sub> /CsPbBr <sub>0.9</sub> I <sub>2.1</sub> NCs | MAPbI <sub>3</sub> /CsPbI <sub>3</sub> NCs |
|-------------------------|--------------------|---------------------------------------------|----------------------------------------------------------------|----------------------------------------------------------------|--------------------------------------------|
| Mean (nm)               | 374.05             | 387.96                                      | 337.03                                                         | 403.32                                                         | 370.99                                     |
| Standard Deviation (nm) | 103.20             | 129.83                                      | 80.5                                                           | 96.92                                                          | 112.43                                     |

**Table S3.** Photovoltaic parameters of the control and optimized device measured at forward and reverse scans.

| Device       | Scan Direction | V <sub>oc</sub> (mV) | J <sub>sc</sub> (mA cm <sup>-2</sup> ) | FF   | η (%) | Hysteresis Index |
|--------------|----------------|----------------------|----------------------------------------|------|-------|------------------|
| Control      | Reverse        | 1.10                 | 20.12                                  | 0.70 | 16.06 | 0.28             |
|              | Forward        | 1.07                 | 18.22                                  | 0.54 | 11.54 |                  |
| NCs Modified | Reverse        | 1.13                 | 22.70                                  | 0.75 | 19.16 | 0.06             |
|              | Forward        | 1.10                 | 21.96                                  | 0.74 | 17.95 |                  |

**Table S4.** Lifetime fitted by the TRPL result of the bare and NCs treatment perovskite films with and without HTL layer.

| Samples                     | $\tau_1$ (ns) | $\tau_2$ (ns) | $A_1$ | $A_2$ | $\tau_{ave}$ (ns) |
|-----------------------------|---------------|---------------|-------|-------|-------------------|
| MAPbI <sub>3</sub>          | 5.61          | 23.43         | 0.73  | 0.27  | 16.35             |
| MAPbI <sub>3</sub> /NCs     | 5.46          | 18.75         | 0.80  | 0.20  | 11.61             |
| MAPbI <sub>3</sub> /HTL     | 4.76          | 14.18         | 0.77  | 0.21  | 8.98              |
| MAPbI <sub>3</sub> /NCs/HTL | 3.16          | 10.18         | 0.75  | 0.25  | 6.80              |

**Table S5.** The parameters of the series resistance ( $R_s$ ) and the recombination resistance ( $R_{rec}$ ) fitted by the Nyquist plots of the devices with and without the modification of CsPbBr<sub>1.2</sub>I<sub>1.8</sub> NCs.

| Device       | $R_s$ ( $\Omega$ ) | $R_{rec}$ ( $\Omega$ ) |
|--------------|--------------------|------------------------|
| Control      | 41.47              | 110680                 |
| NCs Modified | 39.47              | 179420                 |

## References

- 1 G. Yang, C. Chen, F. Yao, Z. Chen, Q. Zhang, X. Zheng, J. Ma, H. Lei, P. Qin, L. Xiong, W. Ke, G. Li, Y. Yan and G. Fang, *Advanced Materials*, 2018, **30**, 1–9.
- 2 H. Yang, W. Yin, W. Dong, L. Gao, C. H. Tan, W. Li, X. Zhang and J. Zhang, *Journal of Materials Chemistry C*, 2020, **8**, 14439–14445.
